# Supplementary material
Source: PubMed Central journal article supplement (PMC3073398)
Supplement: NIHMS254444-supplement-01.pdf [file NIHMS254444-supplement-01.pdf]

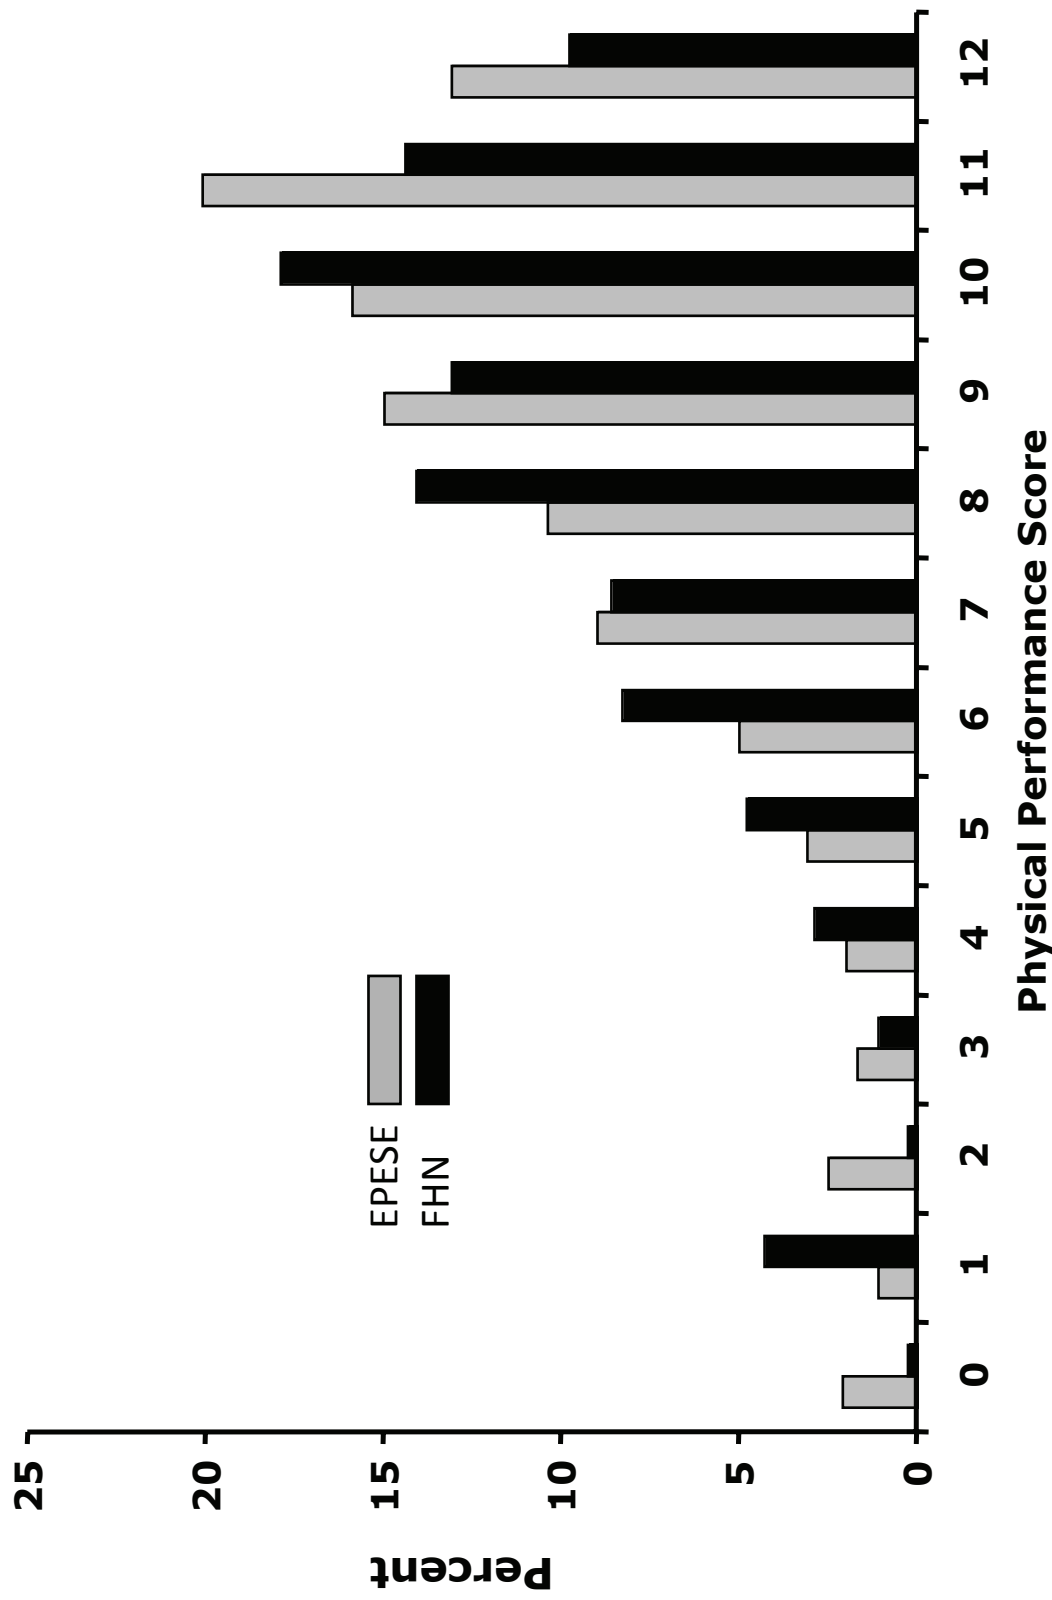

**Fig S1.** Distribution of the short physical performance battery scores of patients enrolled in the FHN Trial and EPESE study. The median ages were 70 (EPESE) and 50.4 (FHN) years. The percentage of women having an SPPB score of 10-12 was 41% in EPESE and only 31% in FHN. The percentage of men with SPPB score of 10-12 was 57.4% in EPESE and only 49.1% in FHN, despite the nearly 2-decade difference in age. The percentage of subjects with low scores (<6) was 17.5% (men) and 28% (women) in FHN and 11.7% (men) and 22% (women) in EPESE. Data source for EPESE results: Guralnik JM, Ferrucci L, Pieper CF, et. al..J Gerontol Lower extremity function and subsequent disability: consistency across studies, predictive models, and value of gait speed alone compared with the short physical performance battery. J Gerontol A Biol Sci Med Sci. 2000.; 55:M221-M231.
